# Supplementary material for: Living with Knee Osteoarthritis: The Positive Impact of Reducing the Knee Torque Induced When Sleeping Supine; A Randomised Clinical Trial
Source: MDPI journal article supplement (doi:10.3390/biomechanics2010010), 2022-03-09
Supplement: s1 [file s1]

Archive with 1 entries (1 files):
- Online Resource(s)-new.pdf
